# Supplementary material for: Influence of dipole and intermolecular interaction on the tuning dielectric and energy storage properties of polystyrene-based polymers
Source: Royal Society of Chemistry journal article supplement (doi:10.1039/d0cp05233g), 2021-01-01
Supplement: d0cp05233g1.pdf [file d0cp05233g1.pdf]

## Electronic Supplementary Material (ESI) for Phys. Chem. Chem. Phys.

### Influence of Dipole and Intermolecular Interaction on the Tuning Dielectric and Energy Storage Properties of Polystyrene-Based Polymers

Qizheng Li,<sup>a</sup> Shaobo Tan,<sup>a</sup> Honghong Gong,<sup>a</sup> Junyong Lu<sup>b</sup>, Wenjing Zhang<sup>c</sup> Xiao Zhang<sup>\*b</sup> and Zhicheng Zhang<sup>\*a</sup>

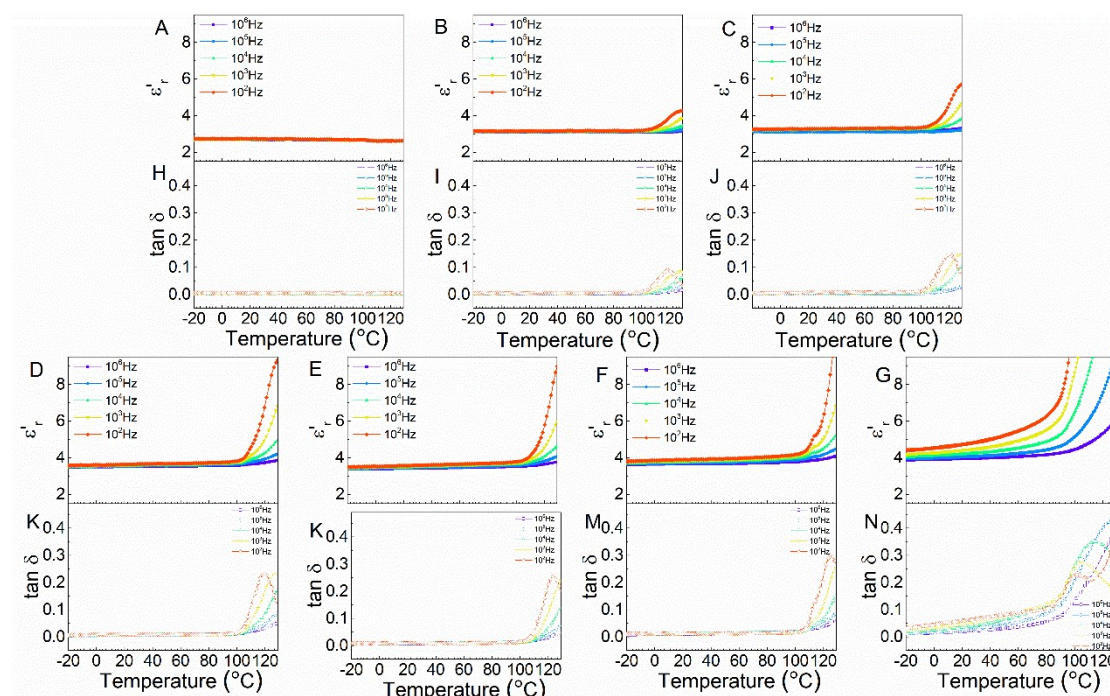

Fig. S1 Permittivity (A-G) and loss factor (H-N) as a function of temperature at different frequencies for polymers: PSt (A, H), AS-1 (B, I), AS-2 (C, J), AS-3 (D, K), AS-4 (E, L), AS-5 (F, M) and PAN (G, N).

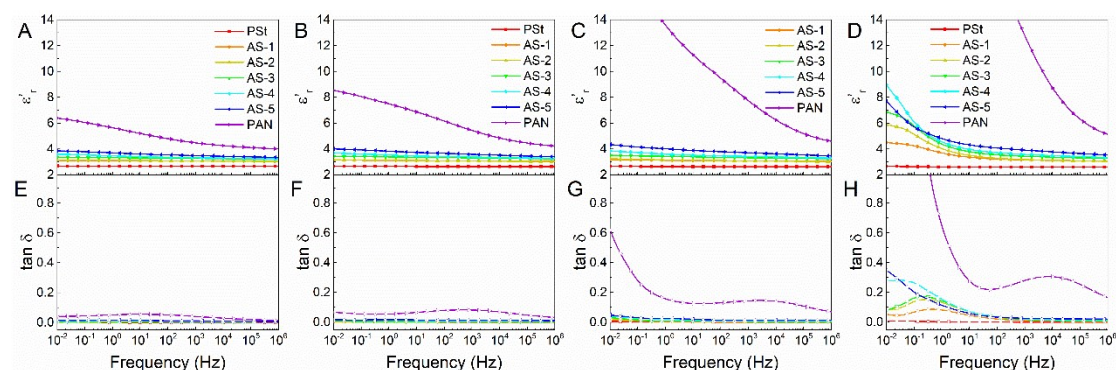

Fig. S2 Permittivity (A, B, C and D) and loss factor (E, F, G and H) of PSt, PAN and ASs, measured at 1 V bias and 20 °C (A, E), 60 °C (B, F), 90 °C (C, G), and 110 °C (D, H), respectively.

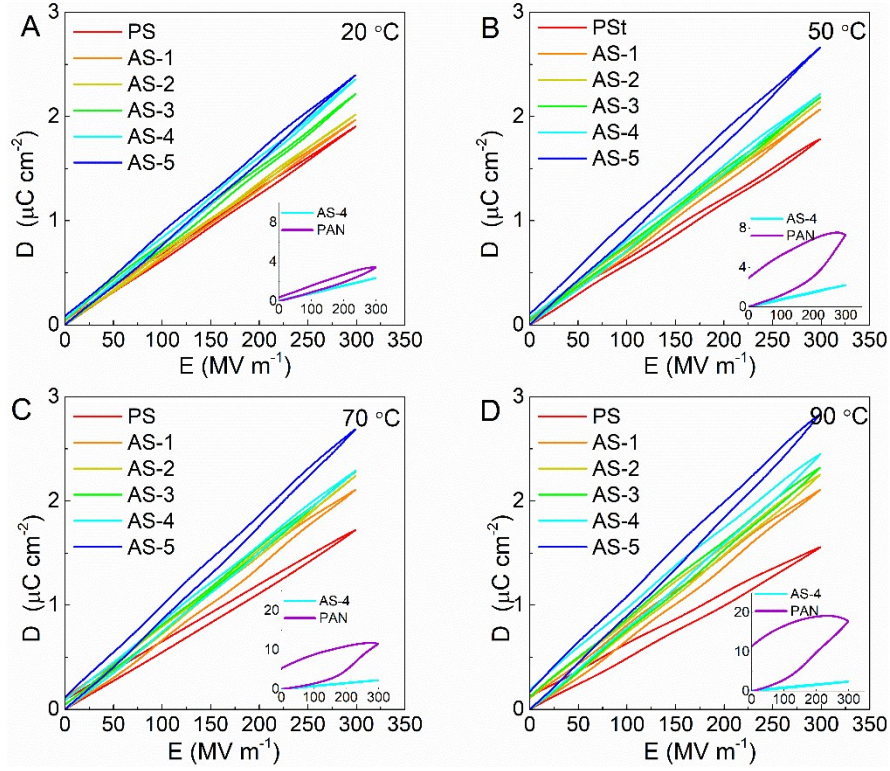

Fig. S3 Comparison of D-E loops of PSt, PAN and ASs measured at an electric field of 300  $\text{MV m}^{-1}$  and different temperatures of 20 °C (A), 50 °C (B), 70 °C (C) and 90 °C (D).

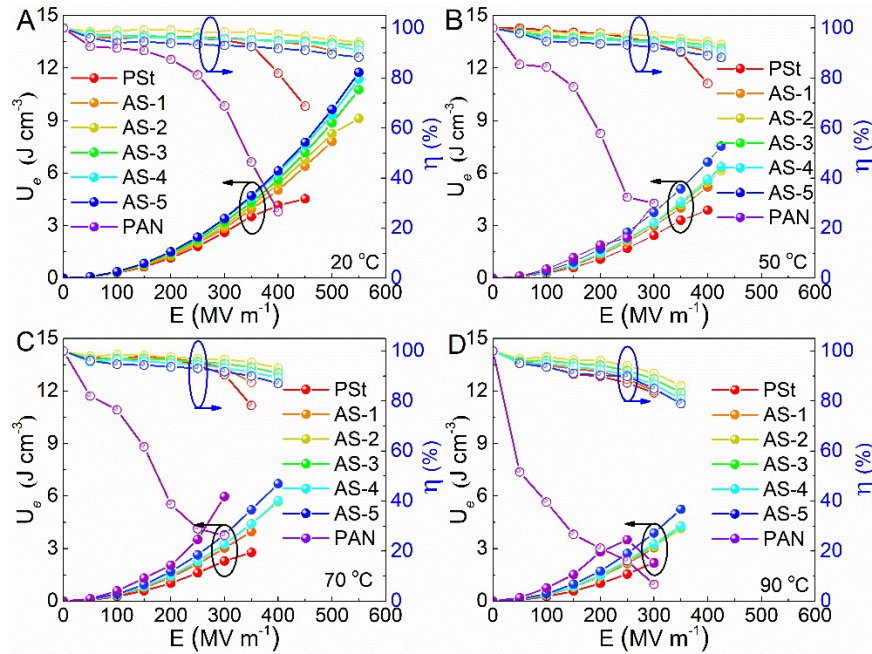

Fig. S4 Comparison of discharged energy density ( $U_e$ ) and charge-discharge efficiency ( $\eta$ ) of PSt, PAN and ASs at different electric fields and different temperatures of 20 °C (A), 50 °C (B), 70 °C (C) and 90 °C (D).



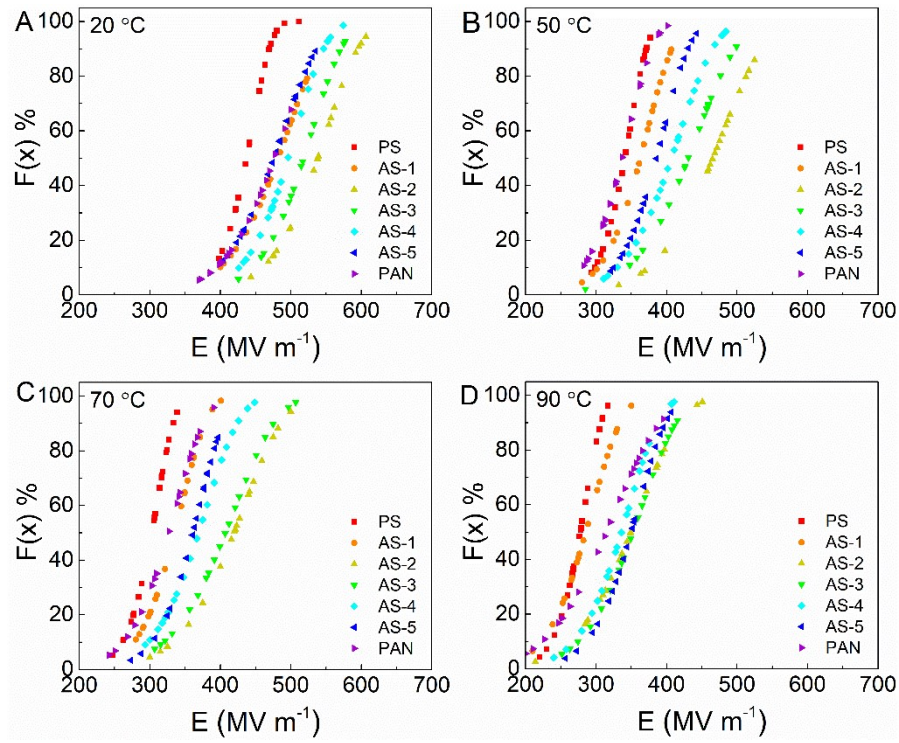

Fig. S5 Weibull distribution of the breakdown electric field of PSt, PAN and ASs with varied ratios of St/AN at 20 °C (A), 50 °C (B), 70 °C (C) and 90 °C (D).

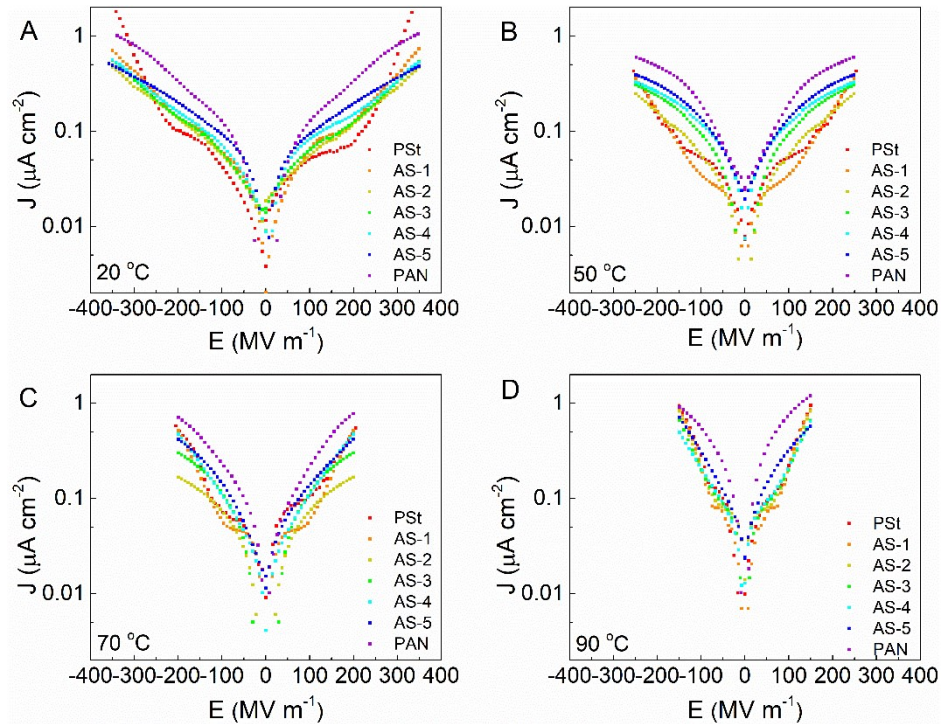

Fig. S6 Leakage current density@ 20 °C (A), 50 °C (B), 70 °C (C) and 90 °C (D) of the PSt, PAN and ASs films as a function of electric fields.

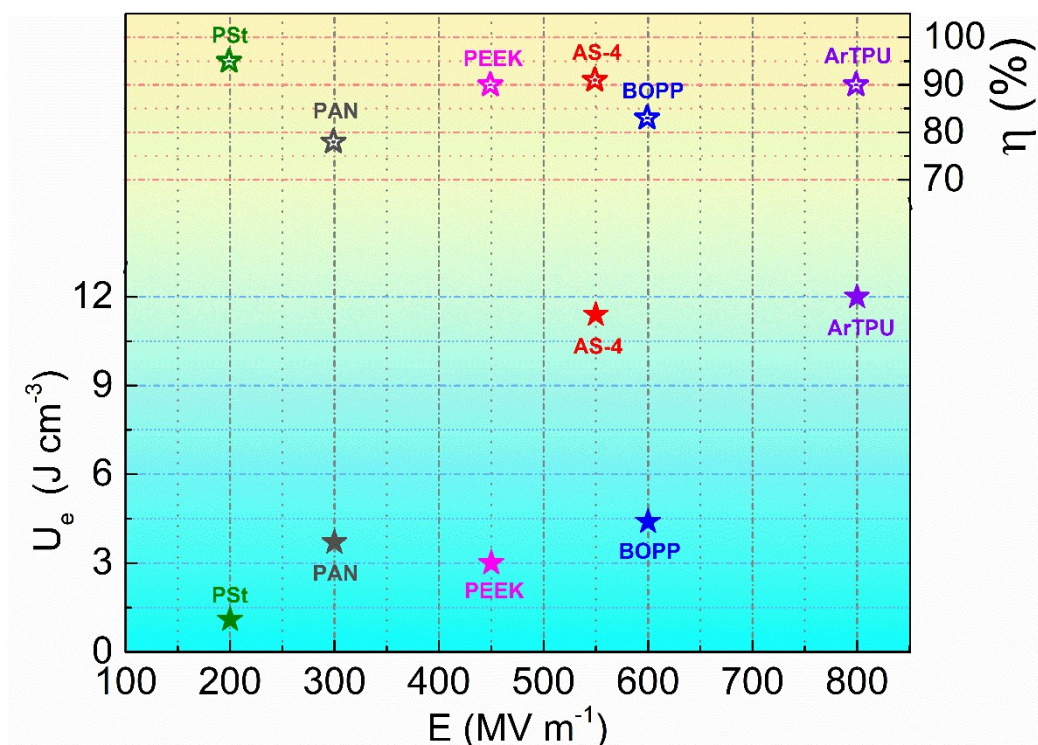

Fig. S7 The discharge energy density ( $U_e$ ) and charge-discharge efficiency ( $\eta$ ) of AS-4 compared to the-state-of-the-art dielectrics.

Polystyrene and polyacrylonitrile were commercial polymers purchased from the Innochem Company.  $U_e$  and  $\eta$  of PSt and PAN were measured in the same way as the AS-4 in section 3. Others come from the references.

| polymers                          | $U_{\text{emax}} \text{ (J cm}^{-3}\text{)}$ | $\eta_{\text{max}} \text{ (%)}$ | Ref |
|-----------------------------------|----------------------------------------------|---------------------------------|-----|
| PP                                | 4@600 MV m <sup>-1</sup>                     | 87                              | S1  |
| BOPP                              | 4.4@600 MV m <sup>-1</sup>                   | 83                              | S2  |
| PP-OH                             | 7@650 MV m <sup>-1</sup>                     | -                               | S3  |
| SO <sub>2</sub> -PPO <sub>s</sub> | 24@805 MV m <sup>-1</sup>                    | 45                              | S4  |
| ArPTU                             | 12@800 MV m <sup>-1</sup> -                  | 90                              | S5  |
| PTU                               | 11@780 MV m <sup>-1</sup>                    | 90                              | S3  |
| PEEK                              | 3.0@450 MV m <sup>-1</sup>                   | 90                              | S6  |
| PAN                               | 3.7@300MV m <sup>-1</sup>                    | 78                              |     |
| PSt                               | 1.1@200MV m <sup>-1</sup>                    | 95                              |     |

## Reference

- S1. M. Rabuffi and G. Picci, *IEEE Transactions on Plasma Science*, 2002, **30**, 1939-1942.
- S2. J. Wei, Z. Zhang, J.-K. Tseng, I. Treufeld, X. Liu, M. H. Litt and L. Zhu, *ACS Applied Materials & Interfaces*, 2015, **7**, 5248-5257.
- S3. Z. Li, G. M. Treich, M. Tefferi, C. Wu, S. Nasreen, S. K. Scheirey, R. Ramprasad, G. A. Sotzing and Y. Cao, *Journal of Materials Chemistry A*, 2019, **7**, 15026-15030.
- S4. Z. Zhang, D. H. Wang, M. H. Litt, L. S. Tan and L. Zhu, *Angewandte Chemie International Edition*, 2018, **57**, 1528-1531.
- S5. Y. Wang, X. Zhou, M. Lin and Q. M. Zhang, *Applied Physics Letters*, 2009, **94**, 202905.
- S6. J. Pan, K. Li, J. Li, T. Hsu and Q. Wang, *Applied Physics Letters*, 2009, **95**, 022902.
